# Supplementary material for: Synthesis, oxide formation, properties and thin film transistor properties of yttrium and aluminium oxide thin films employing a molecular-based precursor route
Source: Royal Society of Chemistry journal article supplement (doi:10.1039/c9ra05348d), 2019-01-01
Supplement: c9ra05348d1.pdf [file c9ra05348d1.pdf]

**Table S1** Crystal data and structure refinement of Al-UN.

|                                   |                                                                                                                                  |
|-----------------------------------|----------------------------------------------------------------------------------------------------------------------------------|
| Empirical formula                 | C7 H28 Al N15 O16                                                                                                                |
| Formula weight                    | 605.42                                                                                                                           |
| Temperature                       | 293(2) K                                                                                                                         |
| Wavelength                        | 0.71073 Å                                                                                                                        |
| Crystal system                    | Monoclinic                                                                                                                       |
| Space group                       | P2 <sub>1</sub> /c                                                                                                               |
| Unit cell dimensions              | a = 21.357(1) Å $\alpha = 90^\circ$ .<br>b = 17.2300(7) Å $\beta = 106.960(7)^\circ$ .<br>c = 14.1833(6) Å $\gamma = 90^\circ$ . |
| Volume                            | 4992.2(4) Å <sup>3</sup>                                                                                                         |
| Z                                 | 8                                                                                                                                |
| Density (calculated)              | 1.611 Mg/m <sup>3</sup>                                                                                                          |
| Absorption coefficient            | 0.183 mm <sup>-1</sup>                                                                                                           |
| F(000)                            | 2528                                                                                                                             |
| Crystal size                      | 0.400 x 0.220 x 0.220 mm <sup>3</sup>                                                                                            |
| Theta range for data collection   | 2.566 to 25.348°.                                                                                                                |
| Index ranges                      | -25 ≤ h ≤ 16, -20 ≤ k ≤ 19, -10 ≤ l ≤ 17                                                                                         |
| Reflections collected             | 18866                                                                                                                            |
| Independent reflections           | 9076 [R(int) = 0.0227]                                                                                                           |
| Completeness to theta = 25.242°   | 99.3 %                                                                                                                           |
| Absorption correction             | Semi-empirical from equivalents                                                                                                  |
| Max. and min. transmission        | 0.961 and 0.930                                                                                                                  |
| Refinement method                 | Full-matrix least-squares on F <sup>2</sup>                                                                                      |
| Data / restraints / parameters    | 9076 / 13 / 706                                                                                                                  |
| Goodness-of-fit on F <sup>2</sup> | 1.030                                                                                                                            |
| Final R indices [I > 2σ(I)]       | R1 = 0.0600, wR2 = 0.1410                                                                                                        |
| R indices (all data)              | R1 = 0.0964, wR2 = 0.1626                                                                                                        |
| Largest diff. peak and hole       | 1.115 and -0.791 e.Å <sup>-3</sup>                                                                                               |

**Table S2** Crystal data and structure refinement of Y-UN.

|                                   |                                                                  |                  |
|-----------------------------------|------------------------------------------------------------------|------------------|
| Identification code               | NK10 (Y-UN)                                                      |                  |
| Empirical formula                 | C <sub>4</sub> H <sub>16</sub> N <sub>11</sub> O <sub>13</sub> Y |                  |
| Formula weight                    | 515.19                                                           |                  |
| Temperature                       | 293(2) K                                                         |                  |
| Wavelength                        | 0.71073 Å                                                        |                  |
| Crystal system                    | Triclinic                                                        |                  |
| Space group                       | P-1                                                              |                  |
| Unit cell dimensions              | a = 7.5428(7) Å                                                  | a = 112.238(8)°. |
|                                   | b = 11.256(1) Å                                                  | b = 96.414(7)°.  |
|                                   | c = 11.976(1) Å                                                  | g = 94.215(7)°.  |
| Volume                            | 927.83(15) Å <sup>3</sup>                                        |                  |
| Z                                 | 2                                                                |                  |
| Density (calculated)              | 1.844 Mg/m <sup>3</sup>                                          |                  |
| Absorption coefficient            | 3.232 mm <sup>-1</sup>                                           |                  |
| F(000)                            | 520                                                              |                  |
| Crystal size                      | 0.500 x 0.480 x 0.460 mm <sup>3</sup>                            |                  |
| Theta range for data collection   | 3.069 to 25.344°.                                                |                  |
| Index ranges                      | -9<=h<=9, -13<=k<=13, -14<=l<=14                                 |                  |
| Reflections collected             | 5662                                                             |                  |
| Independent reflections           | 3363 [R(int) = 0.0152]                                           |                  |
| Completeness to theta = 25.242°   | 99.2 %                                                           |                  |
| Absorption correction             | Semi-empirical from equivalents                                  |                  |
| Max. and min. transmission        | 0.318 and 0.295                                                  |                  |
| Refinement method                 | Full-matrix least-squares on F <sup>2</sup>                      |                  |
| Data / restraints / parameters    | 3363 / 16 / 310                                                  |                  |
| Goodness-of-fit on F <sup>2</sup> | 1.076                                                            |                  |
| Final R indices [I>2sigma(I)]     | R1 = 0.0271, wR2 = 0.0681                                        |                  |
| R indices (all data)              | R1 = 0.0335, wR2 = 0.0695                                        |                  |
| Largest diff. peak and hole       | 0.438 and -0.521 e.Å <sup>-3</sup>                               |                  |

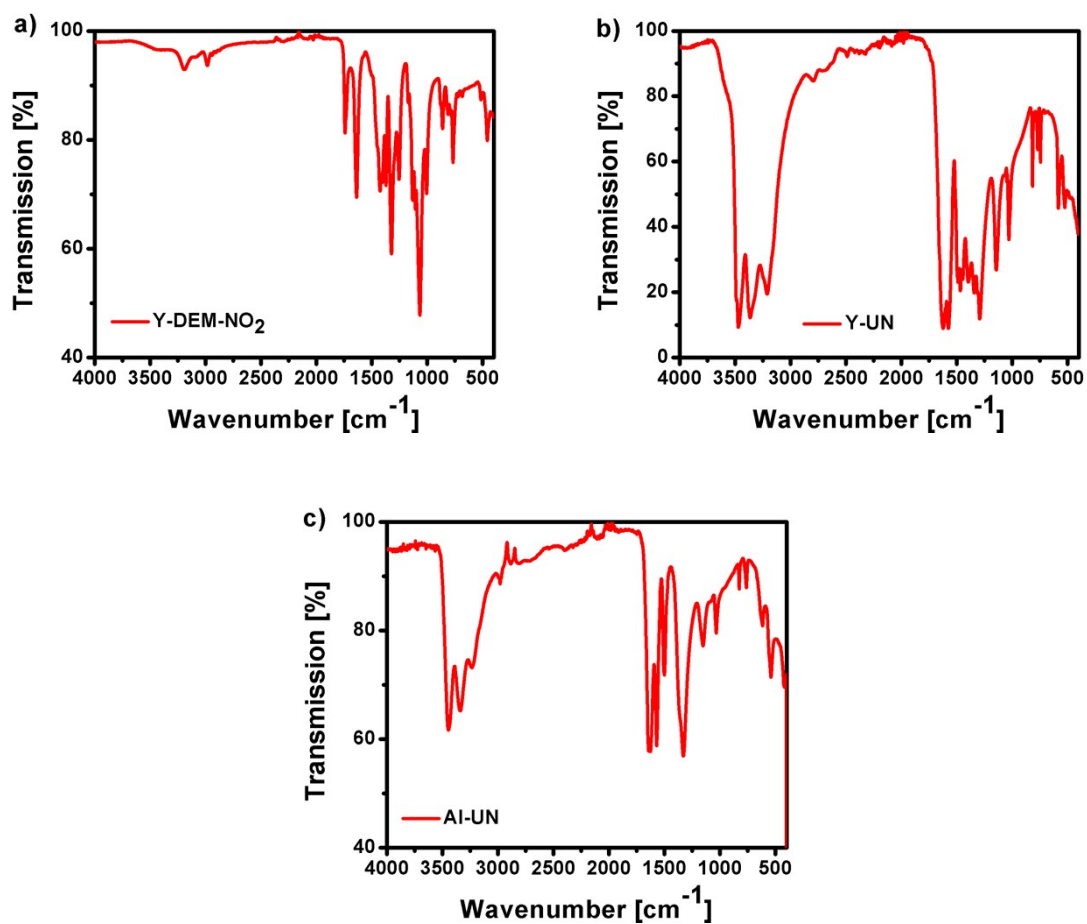

**Fig.S2** FTIR-spectrum of (a) bis(diethyl-2-nitromalonato) nitrate yttrium(III) **1**, (b) dinitrato tetra(urea) yttrium(III)-nitrate **2** and (c) hexakis(urea) aluminium(III)-nitrate **3**.

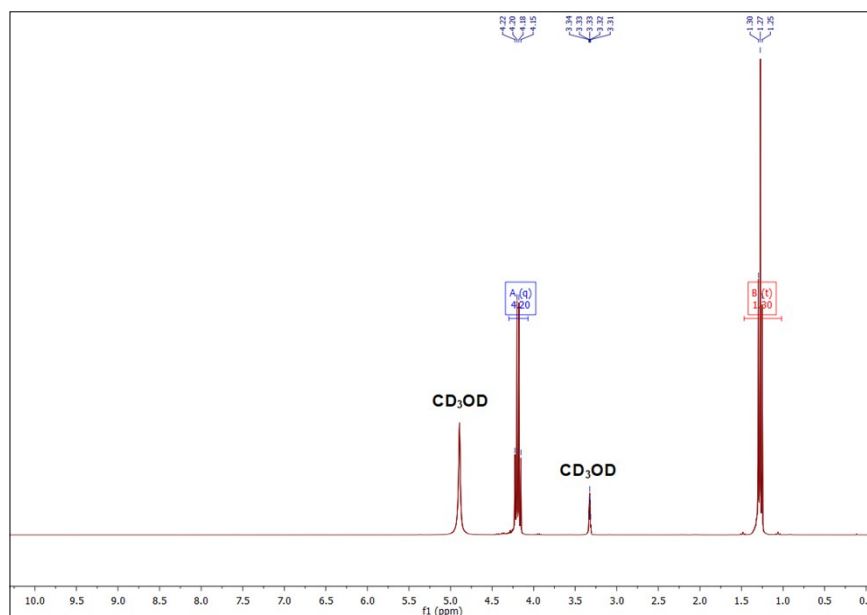

**Fig.S3** <sup>1</sup>H-NMR-spectrum (CD<sub>3</sub>OD) of bis(diethyl-2-nitromalonato) nitrate yttrium(III) **1**.

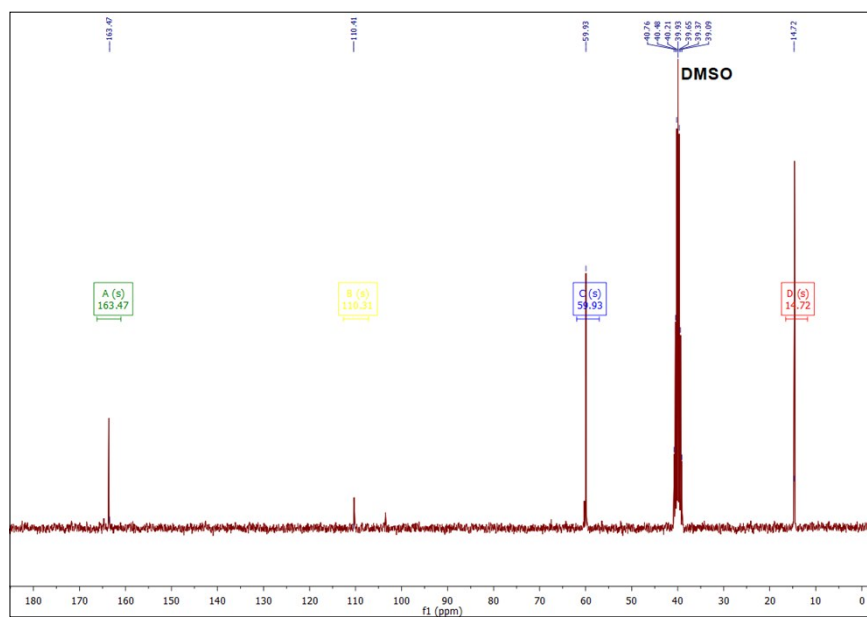

**Fig.S4** <sup>13</sup>C-NMR-spectrum (DMSO) of bis(diethyl-2-nitromalonato) nitrate yttrium(III) **1**.

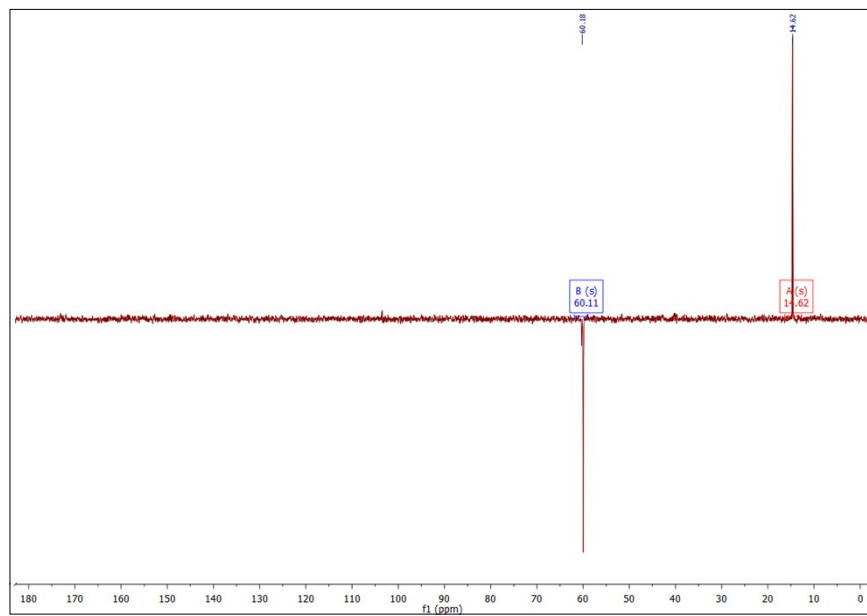

**Fig.S5** DEPT-spectrum (DMSO) of bis(diethyl-2-nitromalonato) nitrate yttrium(III) **1**.

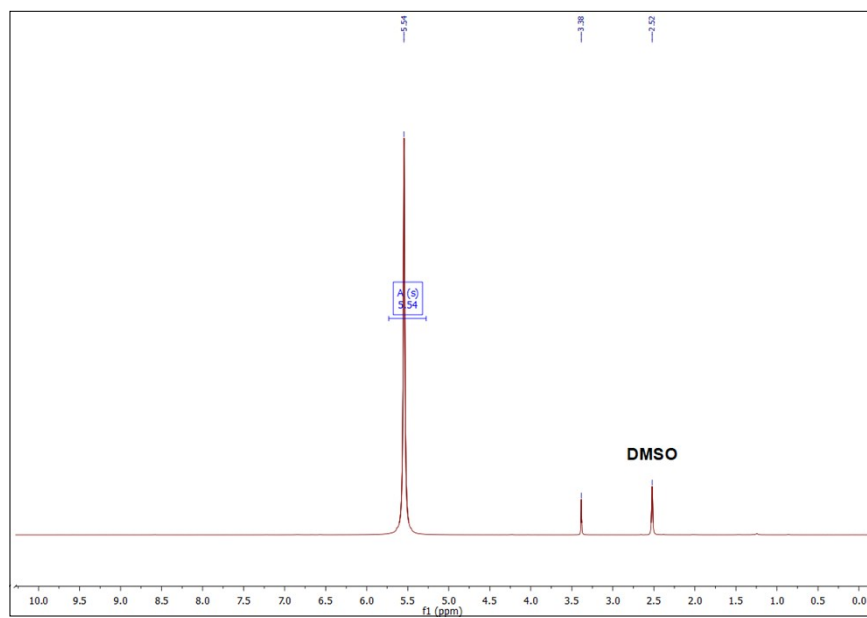

**Fig.S6**  $^1\text{H}$ -NMR-spectrum (DMSO) of dinitrato tetra(urea) yttrium(III)-nitrate **2**.

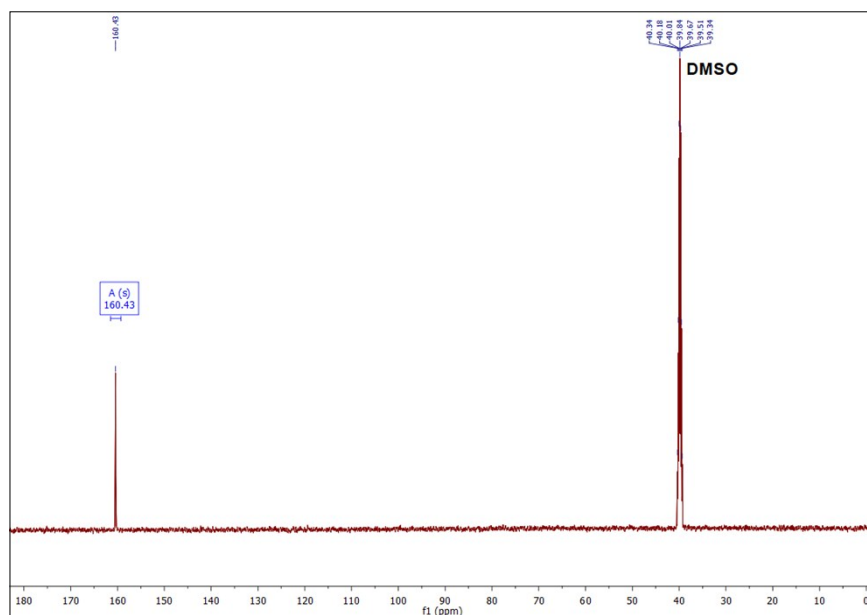

**Fig.S7**  $^{13}\text{C}$ -NMR-spectrum (DMSO) of dinitrato tetra(urea) yttrium(III)-nitrate **2**.

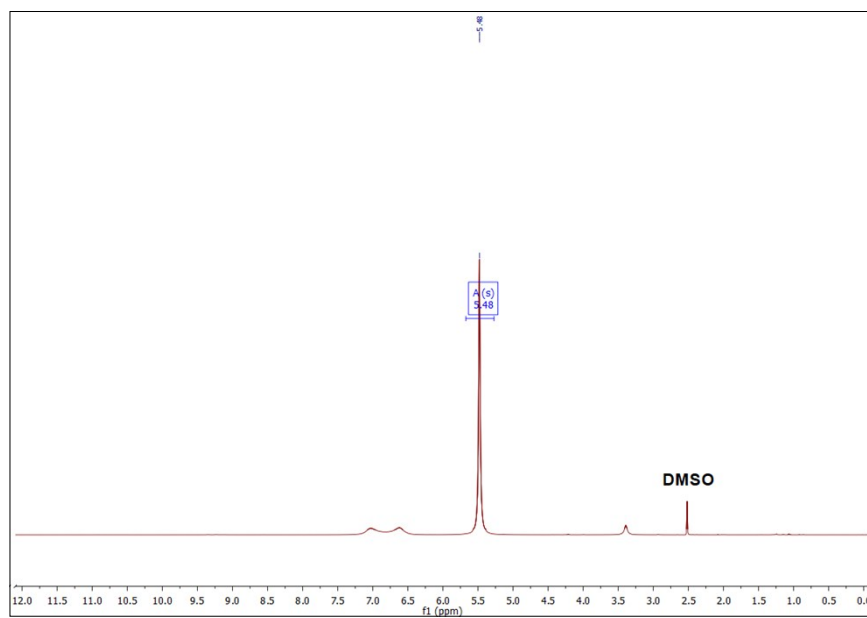

**Fig.S8**  $^1\text{H}$ -NMR-spectrum (DMSO) of hexakis(urea) aluminium(III)-nitrate **3**.

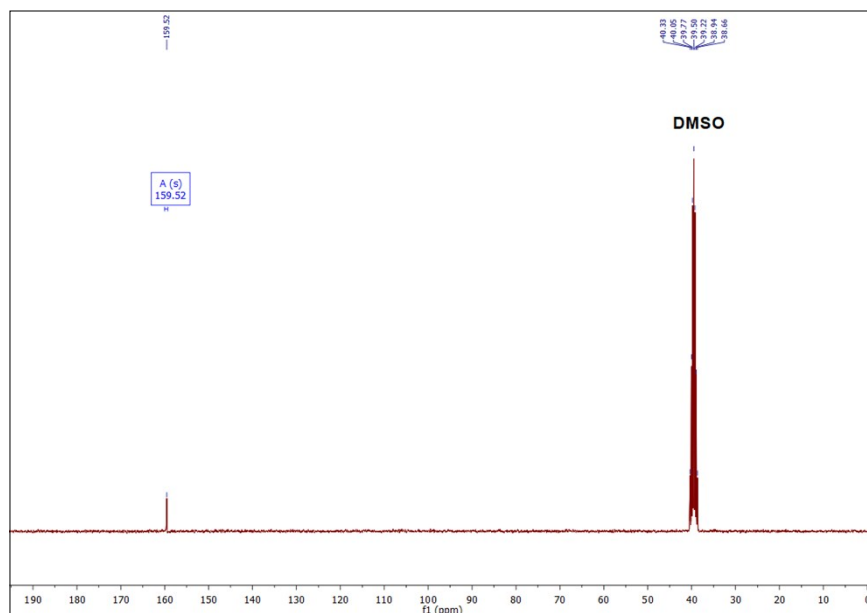

**Fig.S9**  $^{13}\text{C}$ -NMR-spectrum (DMSO) of hexakis(urea) aluminium(III)-nitrate **3**.

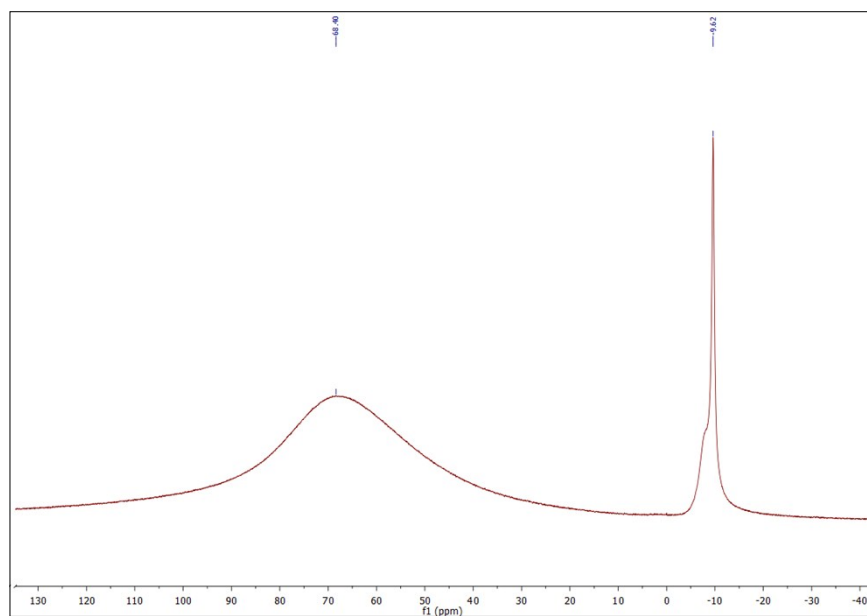

**Fig.S10**  $^{27}\text{Al}$ -NMR-spectrum ( $\text{CD}_3\text{OD}$ ) of hexakis(urea) aluminium(III)-nitrate **3**.



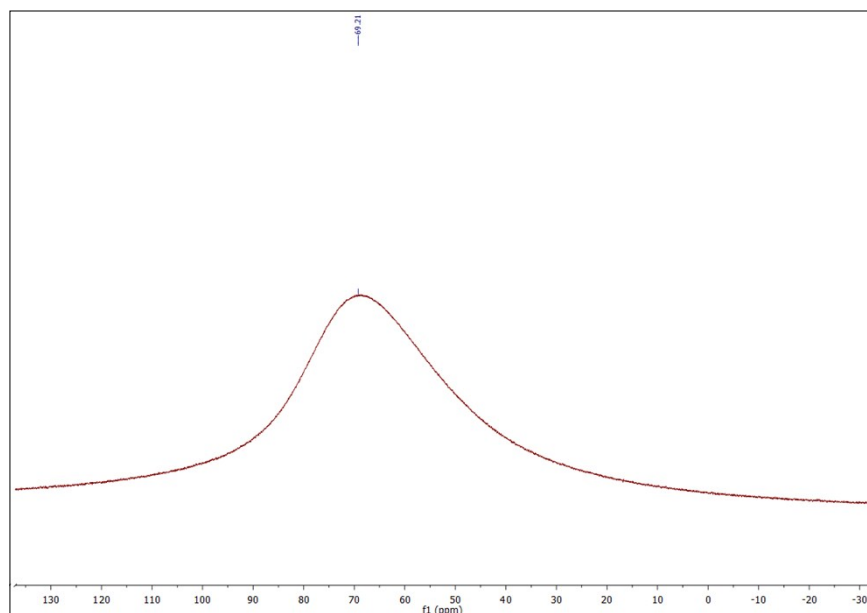

**Fig. S11**  $^{27}\text{Al}$ -NMR-spectrum of empty crucible.

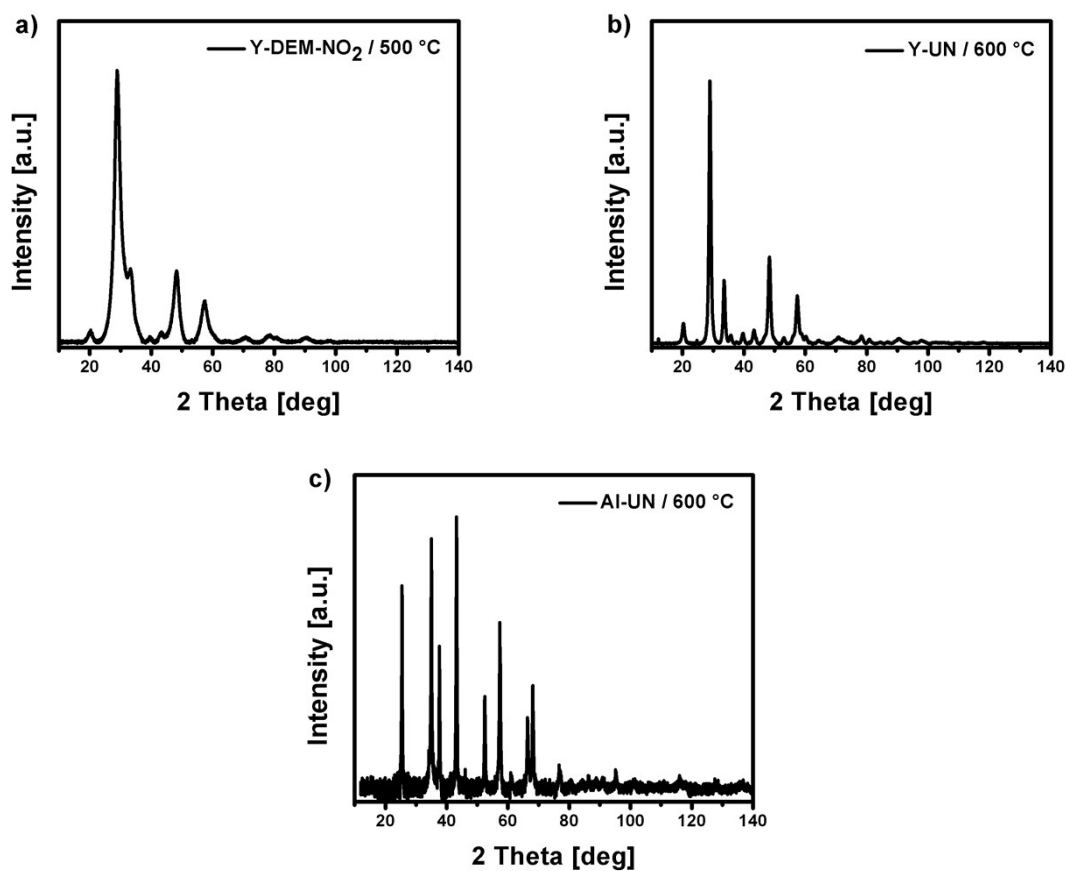

**Fig. S12** XRD of (a) bis(diethyl-2-nitromalonato) nitrato yttrium(III) **1** annealed at 500 °C, (b) dinitrato tetra(urea) yttrium(III)-nitrate **2** annealed at 600 °C and (c) hexakis(urea) aluminium(III)-nitrate **3** annealed at 600°C.

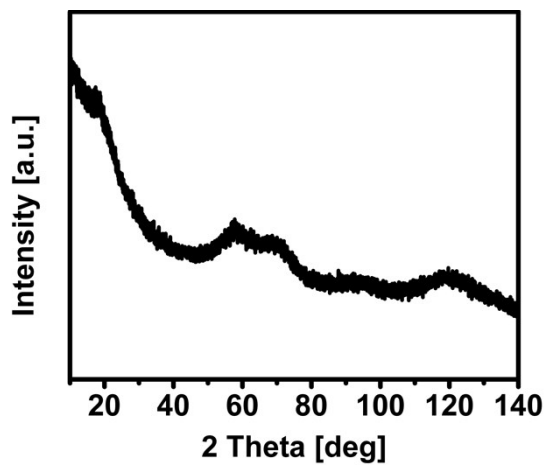

**Fig. S13** XRD of empty crucible.

**Table S3** Summary of spectroscopic ellipsometry measurements.

| Temperature (°C) | Y-DEM-NO <sub>2</sub> (nm) | Y-UN (nm) | Al-UN (nm) |
|------------------|----------------------------|-----------|------------|
| 350              | 156                        | 82        | 59         |
| 300              | 163                        | 87        | 61         |
| 250              | 248                        | /         | 74         |
| 200              | 286                        | /         | 130        |

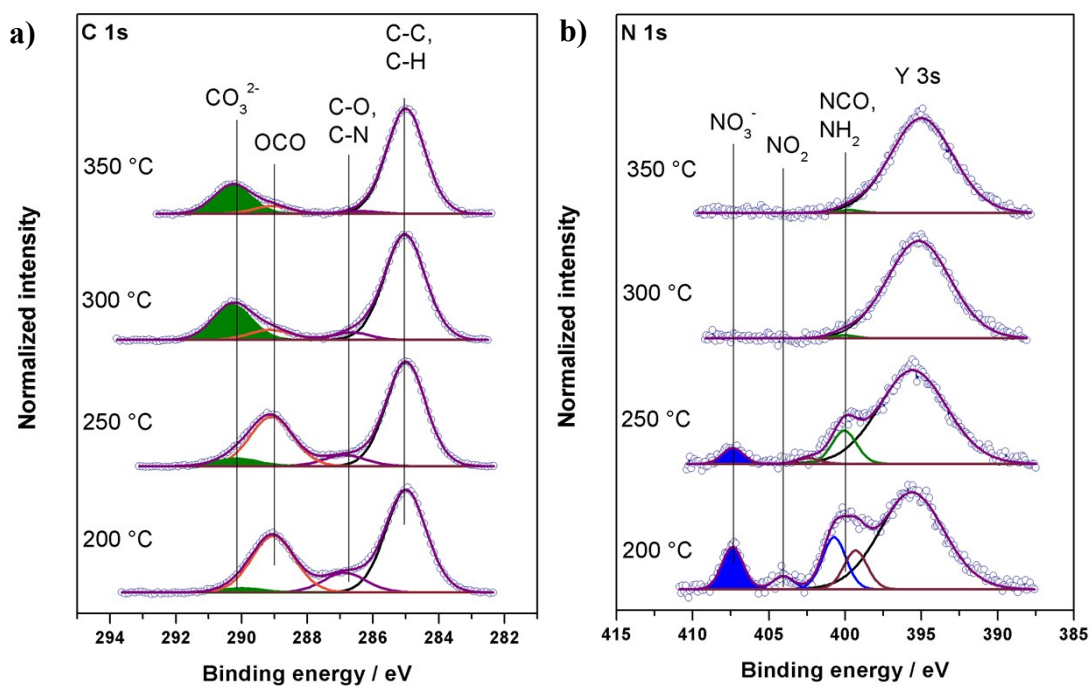

**Fig. S 14** C 1s (a) and N 1s (b) XPS core spectra of samples obtained from Y-DEM-NO<sub>2</sub> precursor **1** annealed for 2 hours each at 200 °C, 250 °C, 300 °C and 350 °C.

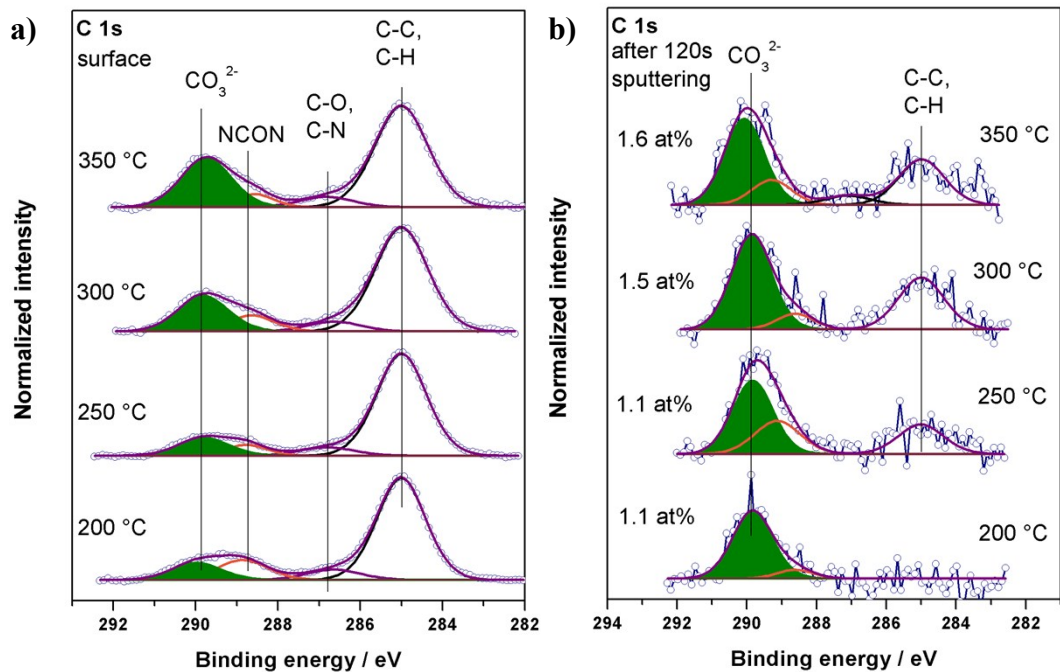

**Fig. S 15** C 1s XPS core spectra of samples obtained from Y-UN precursor **2** annealed for 2 hours each at 200 °C, 250 °C, 300 °C and 350 °C. (a) initial sample without sputtering and (b) after 120 s of surface sputtering (cluster size of 300 atoms with 8000 eV).

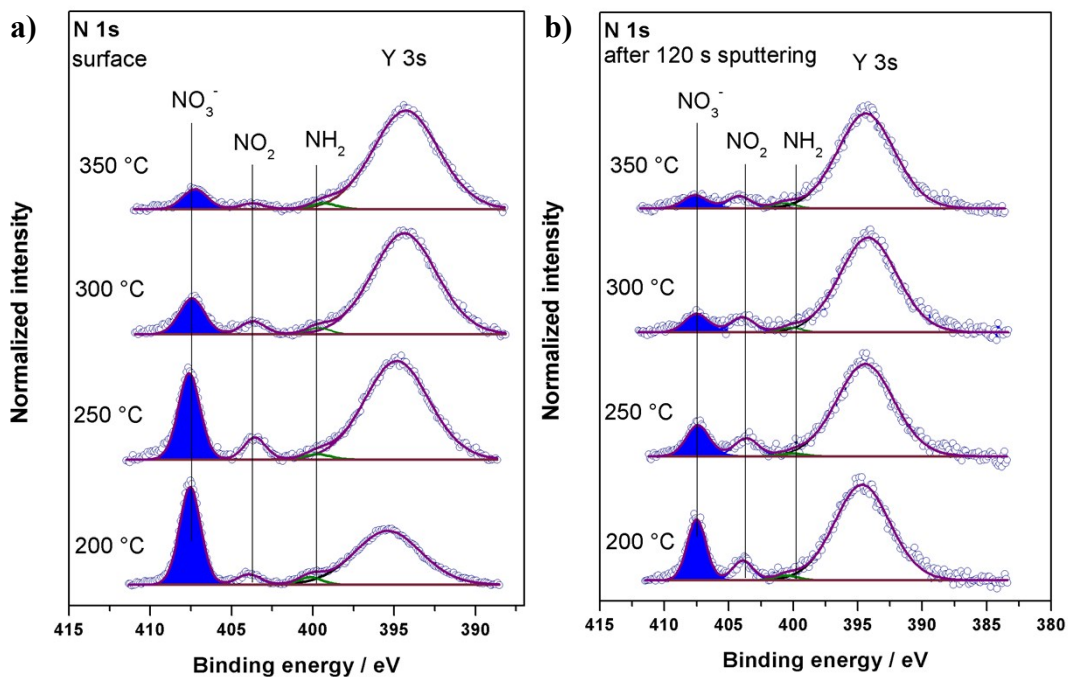

**Fig. S 16** N 1s XPS core spectra of samples obtained from Y-UN precursor **2** annealed for 2 hours each at 200 °C, 250 °C, 300 °C and 350 °C. (a) initial sample surface without sputtering and (b) after 120 s sputtering (cluster size of 300 atoms with 8000 eV).

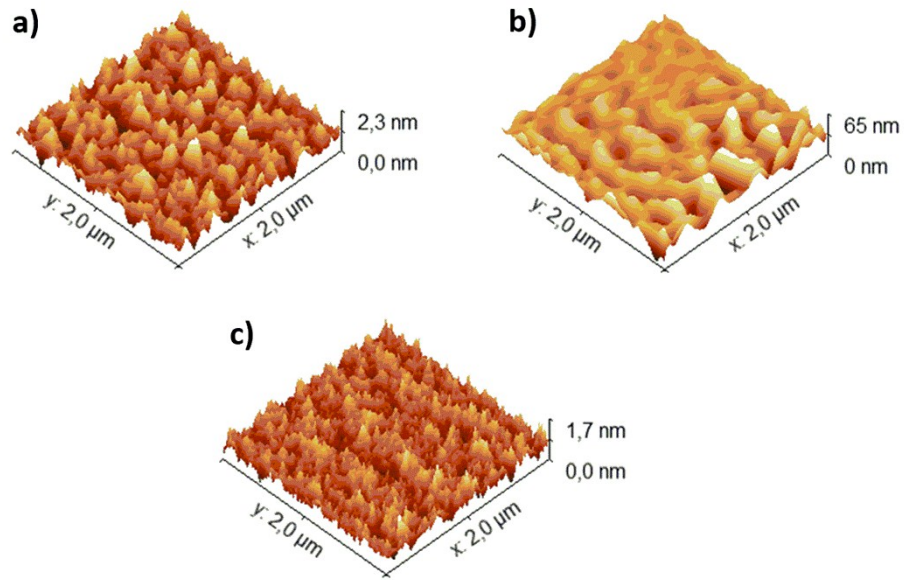

**Fig. S 17** a-c) AFM images of precursor 1, 2 and 3 prepared at 350 °C.

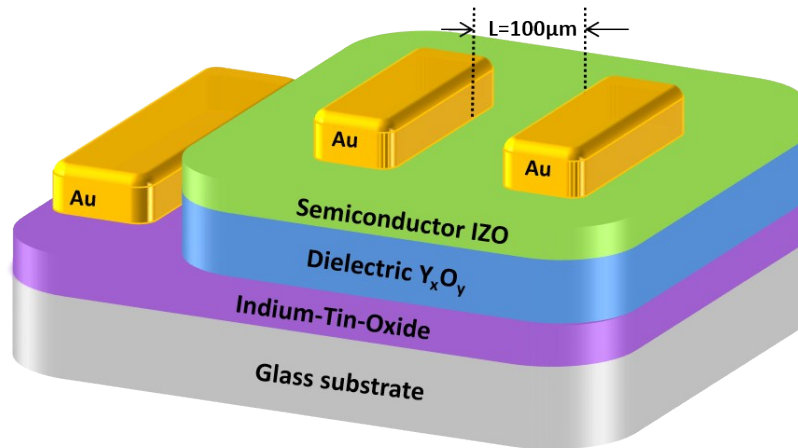

**Fig. S 18** Schematic illustration of the fabricated  $Y_xO_y$  based thin film transistor.
